# Supplementary material for: Extensive horizontal gene transfers between plant pathogenic fungi
Source: PubMed Central journal article supplement (PMC4876562; doi:10.1186/s12915-016-0264-3), 2016-05-23
Supplement: 12915_2016_264_MOESM1_ESM.pdf [file 12915_2016_264_MOESM1_ESM.pdf]

Additional file 1. Species tree constructions with three multi-gene datasets.

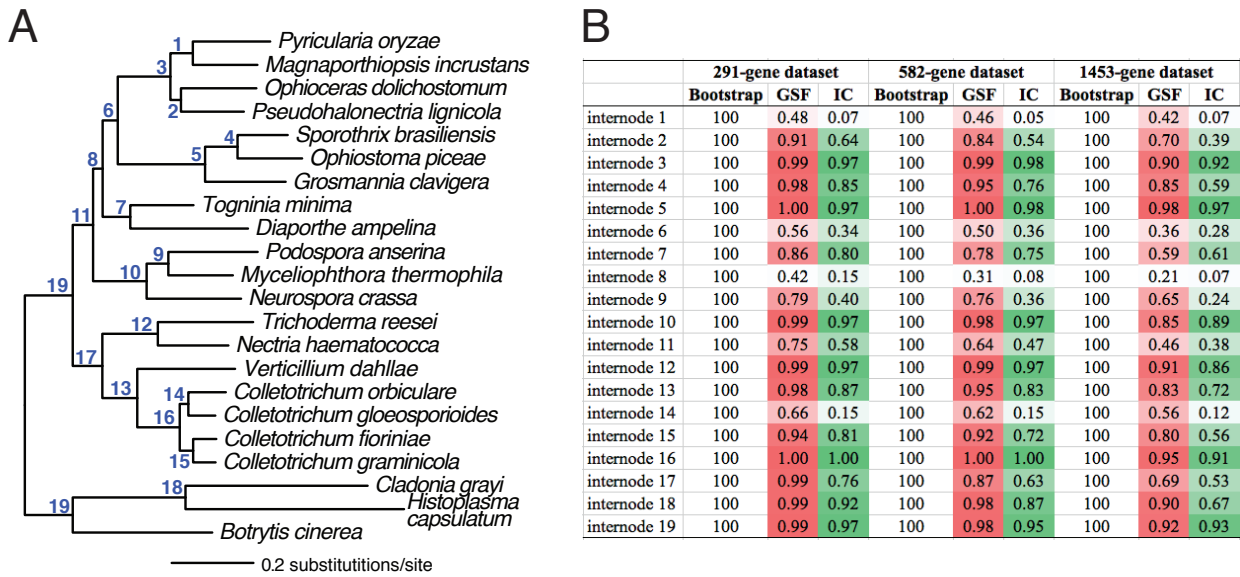

(A) Maximum likelihood tree of 22 Sordariomycetes species using the 291-gene data. MRC tree and eMRC tree display the same topology. Analyses of the 585-gene data and 1453-gene data lead to the topology and similar branch lengths. (B) The internode statistics of the tree shown in panel A are based on analysis of the three multi-gene datasets. The intensity of the colors reflects the relative values across the rows. GSF: gene-support frequency. IC: internode certainty.
