# Supplementary material for: Extensive horizontal gene transfers between plant pathogenic fungi
Source: PubMed Central journal article supplement (PMC4876562; doi:10.1186/s12915-016-0264-3), 2016-05-23
Supplement: 12915_2016_264_MOESM5_ESM.pdf [file 12915_2016_264_MOESM5_ESM.pdf]

Additional file 5. Annotation of HGTs that are transferred between Magnaporthales (using *M. incrustans* as a reference) and *Colletotrichum*

| No. | Family | Genes*                                    | Products                                   | UFboot | Mag. Clade <sup>1</sup> | Donor <sup>2</sup> | CAZyme     | Transporter | Peptidase | Colleto. long_ctg <sup>3</sup> | No. Colleto. <sup>4</sup> |
|-----|--------|-------------------------------------------|--------------------------------------------|--------|-------------------------|--------------------|------------|-------------|-----------|--------------------------------|---------------------------|
| 1   | 1      | <i>M. incrustans.scf1_204.g77</i>         | arabinan_endo-alpha-l-arabinosidase        | 100    | Clade_C                 | Magnapo            | GH43       |             |           | 1                              | >1                        |
| 2   | 2      | <i>M. incrustans.scf108_47.g25</i>        | ligninase_h2                               | 98     | Clade_C                 | Magnapo            | AA2        |             |           | 1                              | >1                        |
| 3   | 3      | <i>M. incrustans.scf11_109.g17</i>        | sodium_symporter_family_protein            | 100    | Clade_C                 | Colleto            |            |             |           | 1                              | >1                        |
| 4   | 4      | <i>M. incrustans.scf11_109.g75</i>        | hypothetical_protein_GGTG_03148            | 92     | Clade_ABC               | unknown            |            |             |           | 1                              | >1                        |
| 5   | 5      | <i>M. incrustans.scf113_40.g13</i>        | amino-acid_permease_inda1                  | 100    | Clade_A                 | Magnapo            |            | TC-DB       |           | 1                              | >1                        |
| 6   | 6      | <i>M. incrustans.scf113_40.g27</i>        | hypothetical_protein_MGG_02132             | 100    | Clade_ABC               | unknown            |            |             |           | 1                              | >1                        |
| 7   | 7      | <i>M. incrustans.scf114_41.g13</i>        | hypothetical_protein_CFIO01_07988          | 100    | Clade_C                 | Magnapo            |            |             |           | 1                              | 1                         |
| 8   | 8      | <i>M. incrustans.scf115_49.g24</i>        | tat_pathway_signal_sequence                | 100    | Clade_C                 | unknown            |            |             |           | 1                              | >1                        |
| 9   | 9      | <i>M. incrustans.scf115_49.g27</i>        | mfs_transporter                            | 100    | Clade_BC                | unknown            |            |             |           | 1                              | >1                        |
| 10  | 10     | <i>M. incrustans.scf135_29.g14</i>        | cation_diffusion_facilitator_1_protein     | 100    | Clade_ABC               | unknown            |            |             |           | 1                              | >1                        |
| 11  | 11     | <i>M. incrustans.scf15_119.g86</i>        | chlorogenic_acid_esterase_precursor        | 100    | Clade_C                 | Colleto            | CE10,CE10  |             | S09X      | 0                              | >1                        |
| 12  | 12     | <i>M. incrustans.scf163_39.g23</i>        | exoglucanase_3                             | 94     | Clade_BC                | Magnapo            | GH6        |             |           | 1                              | >1                        |
| 13  | 13     | <i>M. incrustans.scf163_39.g5</i>         | hypothetical_protein_GGTG_10533            | 96     | Clade_BC                | unknown            |            |             |           | 1                              | 1                         |
| 14  | 14     | <b><i>M. incrustans.scf18_111.g63</i></b> | glycoside_hydrolase                        | 95     | Clade_B                 | Magnapo            | CBM18      |             |           | 1                              | >1                        |
| 15  | 15     | <b><i>M. incrustans.scf18_111.g65</i></b> | domain-containing_protein                  | 100    | Clade_BC                | unknown            | CBM50      |             |           | 0                              | 1                         |
| 16  | 16     | <i>M. incrustans.scf186_26.g5</i>         | cyclohexanone_-monooxygenase               | 100    | Clade_C                 | unknown            |            |             |           | 1                              | >1                        |
| 17  | 17     | <i>M. incrustans.scf19_115.g13</i>        | carboxylesterase_family_protein            | 100    | Clade_C                 | Magnapo            | CE10       |             | S09X      | 1                              | >1                        |
| 18  | 18     | <i>M. incrustans.scf19_115.g97</i>        | choline_monooxygenase                      | 100    | Clade_BC                | Colleto            |            |             |           | 1                              | >1                        |
| 19  | 19     | <i>M. incrustans.scf195_22.g10</i>        | hypothetical_protein_GGTG_04880            | 100    | Clade_C                 | Magnapo            | GH131      |             |           | 1                              | >1                        |
| 20  | 20     | <b><i>M. incrustans.scf2_209.g41</i></b>  | hypothetical_protein_GGTG_05571            | 99     | Clade_C                 | Magnapo            | GH115      |             |           | 1                              | >1                        |
| 21  | 21     | <b><i>M. incrustans.scf2_209.g43</i></b>  | glycosyl_hydrolase_family_38_domain        | 100    | Clade_BC                | Colleto            | GH38       |             |           | 1                              | >1                        |
| 22  | 22     | <i>M. incrustans.scf2_209.g60</i>         | arylsulfatase_precursor                    | 100    | Clade_C                 | Magnapo            | CBM20 GH15 |             |           | 1                              | 1                         |
| 23  | 23     | <i>M. incrustans.scf206_28.g23</i>        | amino_acid_permease                        | 97     | Clade_ABC               | Colleto            |            | TC-DB       |           | 1                              | >1                        |
| 24  | 24     | <i>M. incrustans.scf208_29.g19</i>        | mfs_general_substrate_transporter          | 100    | Clade_C                 | Magnapo            |            | TC-DB       |           | 1                              | 1                         |
| 25  | 25     | <b><i>M. incrustans.scf209_24.g8</i></b>  | short_chain_dehydrogenase_reductase_family | 99     | Clade_C                 | unknown            |            |             |           | 1                              | >1                        |
| 26  | 26     | <b><i>M. incrustans.scf209_24.g9</i></b>  | hypothetical_protein_GGTG_08358            | 100    | Clade_ABC               | Colleto            |            |             |           | 1                              | >1                        |
| 27  | 27     | <b><i>M. incrustans.scf21_75.g70</i></b>  | hypothetical_protein_CGGC5_15363           | 93     | Clade_BC                | Magnapo            |            |             |           | 0                              | 1                         |
| 28  | 28     | <b><i>M. incrustans.scf21_75.g71</i></b>  | methyltransferase_type_partial             | 100    | Clade_C                 | unknown            |            |             |           | 0                              | 1                         |
| 29  | 29     | <i>M. incrustans.scf225_20.g1</i>         | peptidase_family_m28                       | 100    | Clade_ABC               | Magnapo            | CBM12      |             | M28A      | 1                              | >1                        |
| 30  | 30     | <i>M. incrustans.scf23_91.g22</i>         | pectate_lyase                              | 99     | Clade_BC                | Magnapo            | PL1,PL1    |             |           | 1                              | >1                        |
| 31  | 31     | <b><i>M. incrustans.scf233_15.g10</i></b> | beta-ketoacyl_synthase_domain-containing   | 100    | Clade_B                 | Magnapo            |            |             |           | 1                              | >1                        |
| 32  | 32     | <b><i>M. incrustans.scf233_15.g11</i></b> |                                            | 100    | Clade_B                 | Magnapo            |            |             |           | 1                              | >1                        |
| 33  | 32     | <b><i>M. incrustans.scf233_15.g12</i></b> | enoyl_reductase                            | 100    | Clade_B                 | Magnapo            |            |             |           | 1                              | 1                         |
| 34  | 33     | <i>M. incrustans.scf24_104.g84</i>        | arsenite_efflux_transporter                | 100    | Clade_BC                | unknown            |            |             |           | 1                              | >1                        |
| 35  | 34     | <i>M. incrustans.scf26_101.g7</i>         | acidic_mammalian_chitinase                 | 100    | Clade_BC                | Magnapo            | GH18       |             |           | 1                              | >1                        |

|    |    |                                           |                                             |     |           |         |            |   |    |
|----|----|-------------------------------------------|---------------------------------------------|-----|-----------|---------|------------|---|----|
| 36 | 35 | <i>M. incrustans.scf269_12.g7</i>         | hypothetical_protein_GGTG_02130             | 100 | Clade_ABC | unknown |            | 1 | >1 |
| 37 | 36 | <i>M. incrustans.scf294_12.g12</i>        | methyltransferase_domain-containing_protein | 100 | Clade_ABC | Colleto |            | 1 | >1 |
| 38 | 37 | <i>M. incrustans.scf3_191.g103</i>        | amino_acid_permease                         | 100 | Clade_C   | Colleto | TC-DB      | 1 | >1 |
| 39 | 38 | <i>M. incrustans.scf3_191.g97</i>         | nad_-binding_protein                        | 98  | Clade_C   | unknown |            | 1 | >1 |
| 40 | 39 | <i>M. incrustans.scf302_11.g7</i>         | isochorismatase_hydrolase                   | 85  | Clade_BC  | unknown |            | 1 | >1 |
| 41 | 40 | <i>M. incrustans.scf307_9.g9</i>          | mgt_family_glycosyltransferase              | 99  | Clade_BC  | Magnapo | GT1        | 1 | >1 |
| 42 | 41 | <i>M. incrustans.scf308_8.g1</i>          | ligninase_1g6_precursor                     | 100 | Clade_BC  | unknown | AA2        | 1 | >1 |
| 43 | 42 | <i>M. incrustans.scf309_10.g4</i>         | methyltransferase_domain-containing_protein | 100 | Clade_BC  | Colleto |            | 1 | >1 |
| 44 | 43 | <i>M. incrustans.scf31_87.g11</i>         | hexose_transporter                          | 99  | Clade_BC  | Colleto |            | 1 | >1 |
| 45 | 44 | <i>M. incrustans.scf31_87.g44</i>         | extracellular_cellulase                     | 95  | Clade_ABC | unknown | CBM63      | 1 | >1 |
| 46 | 45 | <i>M. incrustans.scf32_89.g43</i>         | tannase_and_feruloyl_esterase               | 100 | Clade_C   | Magnapo |            | 1 | >1 |
| 47 | 46 | <i>M. incrustans.scf32_89.g81</i>         | glycosyl_hydrolase_family_81                | 100 | Clade_C   | Magnapo | GH81       | 1 | >1 |
| 48 | 46 | <i>M. incrustans.scf75_46.g31</i>         | glycosyl_hydrolase_family_81                | 100 | Clade_C   | Colleto | GH81       | 1 | >1 |
| 49 | 47 | <i>M. incrustans.scf321_10.g5</i>         | hypothetical_protein_GGTG_13171             | 100 | Clade_BC  | Magnapo |            | 1 | >1 |
| 50 | 48 | <i>M. incrustans.scf33_97.g79</i>         | hypothetical_protein_GGTG_05928             | 100 | Clade_ABC | unknown |            | 1 | 1  |
| 51 | 49 | <i>M. incrustans.scf33_97.g84</i>         | monocarboxylate_permease-like_protein       | 100 | Clade_ABC | Colleto | TC-DB      | 1 | >1 |
| 52 | 50 | <i>M. incrustans.scf34_78.g16</i>         | cornichon_protein                           | 94  | Clade_ABC | unknown |            | 1 | >1 |
| 53 | 51 | <i>M. incrustans.scf4_208.g109</i>        | choline_transport                           | 96  | unclear   | Magnapo | TC-DB      | 1 | >1 |
| 54 | 52 | <i>M. incrustans.scf4_208.g112</i>        | dimethylaniline_monooxygenase               | 100 | Clade_C   | Magnapo |            | 1 | >1 |
| 55 | 53 | <i>M. incrustans.scf4_208.g135</i>        | mannitol_1-phosphate_dehydrogenase          | 100 | Clade_ABC | Magnapo |            | 1 | >1 |
| 56 | 54 | <i>M. incrustans.scf4_208.g23</i>         | heterokaryon_incompatibility_protein        | 100 | Clade_C   | Colleto |            | 1 | >1 |
| 57 | 55 | <i>M. incrustans.scf4_208.g53</i>         | major_facilitator_superfamily_transporter   | 100 | Clade_C   | Magnapo |            | 1 | >1 |
| 58 | 56 | <i>M. incrustans.scf4_208.g57</i>         | glyoxalase_bleomycin_resistance_protein     | 100 | Clade_C   | Colleto |            | 1 | >1 |
| 59 | 56 | <i>M. incrustans.scf46_67.g47</i>         | dioxygenase_superfamily                     | 100 | Clade_BC  | unknown |            | 1 | >1 |
| 60 | 57 | <i>M. incrustans.scf4_208.g79</i>         | asparagine_synthase                         | 100 | unclear   | Magnapo | C44        | 1 | >1 |
| 61 | 58 | <i>M. incrustans.scf40_91.g81</i>         | tripeptidyl-peptidase_sed4                  | 100 | Clade_ABC | Magnapo | S53        | 1 | >1 |
| 62 | 59 | <i>M. incrustans.scf43_84.g22</i>         | leucoanthocyanidin_reductase                | 99  | Clade_BC  | Magnapo | CE12       | 1 | >1 |
| 63 | 60 | <i>M. incrustans.scf50_60.g58</i>         | glucose_transporter_hxt1                    | 100 | Clade_BC  | Colleto |            | 1 | >1 |
| 64 | 61 | <i>M. incrustans.scf54_86.g81</i>         | arylsulfatase_protein                       | 100 | Clade_B   | unknown | CBM20 GH15 | 0 | 1  |
| 65 | 62 | <i>M. incrustans.scf55_68.g61</i>         | fatty-acid_amide_hydrolase                  | 100 | Clade_B   | unknown |            | 1 | >1 |
| 66 | 63 | <i>M. incrustans.scf55_68.g64</i>         | major_facilitator_superfamily_transporter   | 99  | Clade_BC  | unknown | TC-DB      | 1 | >1 |
| 67 | 64 | <b><i>M. incrustans.scf61_80.g17</i></b>  | mfs_multidrug_transporter                   | 100 | Clade_BC  | Magnapo |            | 1 | >1 |
| 68 | 65 | <b><i>M. incrustans.scf61_80.g18</i></b>  | c6_finger_domain-containing_protein         | 100 | Clade_BC  | Magnapo |            | 1 | >1 |
| 69 | 66 | <i>M. incrustans.scf61_80.g74</i>         | glycoside_hydrolase_family_43_protein       | 96  | Clade_C   | Magnapo |            | 1 | >1 |
| 70 | 67 | <i>M. incrustans.scf63_70.g23</i>         | endoplasmic_reticulum_protein               | 99  | Clade_ABC | Magnapo |            | 1 | >1 |
| 71 | 68 | <i>M. incrustans.scf65_53.g1</i>          | ankyrin_repeat-containing                   | 100 | Clade_C   | unknown |            | 0 | 1  |
| 72 | 69 | <i>M. incrustans.scf65_53.g44</i>         | mas3_protein                                | 89  | Clade_BC  | Magnapo |            | 1 | >1 |
| 73 | 70 | <i>M. incrustans.scf66_71.g16</i>         | general_amino_acid_permease_agp2            | 100 | Clade_BC  | Colleto | TC-DB      | 1 | >1 |
| 74 | 71 | <i>M. incrustans.scf68_59.g21</i>         | nitroreductase_family_protein               | 100 | Clade_A   | Magnapo |            | 1 | 1  |
| 75 | 72 | <b><i>M. incrustans.scf7_130.g116</i></b> | glycosyl_hydrolase                          | 100 | Clade_BC  | Magnapo | GH92       | 1 | >1 |
| 76 | 73 | <b><i>M. incrustans.scf7_130.g118</i></b> | sulphydryl_oxidase                          | 100 | Clade_B   | Magnapo |            | 1 | >1 |

|    |    |                                          |                                           |     |           |         |       |       |   |    |
|----|----|------------------------------------------|-------------------------------------------|-----|-----------|---------|-------|-------|---|----|
| 77 | 74 | <i>M. incrustans.scf75_46.g36</i>        | glycosyltransferase_family_90_protein     | 100 | Clade_BC  | Magnapo | GT90  |       | 1 | 1  |
| 78 |    | <i>M. incrustans.scf83_65.g53</i>        |                                           | 100 | Clade_ABC | Magnapo | GT90  |       | 1 | 1  |
| 79 | 75 | <i>M. incrustans.scf8_147.g137</i>       | polyketide_synthase                       | 100 | Clade_ABC | unknown | GT2   |       | 1 | >1 |
| 80 | 76 | <i>M. incrustans.scf8_147.g65</i>        | abc_transporter                           | 100 | Clade_ABC | Magnapo |       |       | 1 | >1 |
| 81 | 77 | <i>M. incrustans.scf8_147.g9</i>         | secreted_glucosidase                      | 100 | Clade_BC  | Magnapo | GH16  |       | 1 | >1 |
| 82 | 78 | <i>M. incrustans.scf81_37.g22</i>        | rhamnogalacturonan_acetylerase            | 100 | Clade_A   | unknown | CE12  |       | 1 | >1 |
| 83 | 79 | <i>M. incrustans.scf83_65.g47</i>        | choline_dehydrogenase                     | 100 | Clade_ABC | Colleto | AA3   |       | 1 | >1 |
| 84 | 80 | <b><i>M. incrustans.scf86_70.g25</i></b> | aminotransferase_class_i_and_ii           | 100 | Clade_B   | unknown |       |       | 1 | 1  |
| 85 | 81 | <b><i>M. incrustans.scf86_70.g26</i></b> | epoxide_hydrolase_2                       | 100 | Clade_B   | Magnapo |       | S33   | 1 | 1  |
| 86 | 82 | <b><i>M. incrustans.scf86_70.g27</i></b> | cytochrome_p450                           | 100 | Clade_B   | Magnapo |       |       | 1 | 1  |
| 87 | 83 | <i>M. incrustans.scf9_129.g18</i>        | nacht_and_tpr_domain-containing_protein   | 99  | Clade_ABC | Colleto |       |       | 1 | >1 |
| 88 | 84 | <i>M. incrustans.scf9_129.g28</i>        | glycoside_hydrolase_family_18_protein     | 98  | Clade_C   | unknown | CBM18 |       | 0 | 1  |
| 89 | 85 | <i>M. incrustans.scf9_129.g61</i>        | calcium-transporting_atpase               | 97  | Clade_ABC | Colleto |       | TC-DB | 1 | >1 |
| 90 | 86 | <i>M. incrustans.scf91_52.g17</i>        | hypothetical_protein_GGTG_06400           | 94  | Clade_BC  | unknown |       |       | 1 | >1 |
| 91 | 87 | <i>M. incrustans.scf94_48.g2</i>         | high-affinity_nicotinic_acid_transporter  | 99  | Clade_ABC | unknown |       | TC-DB | 1 | >1 |
| 92 | 88 | <i>M. incrustans.scf94_48.g8</i>         | major_facilitator_superfamily_transporter | 99  | Clade_BC  | Magnapo |       |       | 1 | >1 |
| 93 | 89 | <i>M. incrustans.scf97_44.g2</i>         | phospholipase_carboxylesterase            | 94  | Clade_B   | Magnapo |       |       | 1 | >1 |

\* Genes in transferred genomic segments are shown in bold face.

<sup>1</sup> Magnaporthales comprise three major clades (i.e., clades A, B and C). This column indicates tentatively which Magnaporthales clades were involved in the gene transfer with *Colletotrichum*.

<sup>2</sup> The putative donor of the gene transfers between Magnaporthales and *Colletotrichum*.

<sup>3</sup> If one or more transferred *Colletotrichum* genes are located in long contigs (encoding  $\geq 5$  genes), value (1) is assigned. Value (0) is assigned otherwise.

<sup>4</sup> Number of *Colletotrichum* species involved in the individual HGT instance.
