# Supplementary material for: Extensive horizontal gene transfers between plant pathogenic fungi
Source: PubMed Central journal article supplement (PMC4876562; doi:10.1186/s12915-016-0264-3), 2016-05-23
Supplement: 12915_2016_264_MOESM8_ESM.pdf [file 12915_2016_264_MOESM8_ESM.pdf]

Additional file 8. Annotation of HGTs that are transferred between Magnaporthales (using *O. dolichostomum* as a reference) and *Colletotrichum*

| No. | Family | Genes*                                       | Products                               | UFboot | Mag-Clade <sup>1</sup> | Donor <sup>2</sup> | CAZyme   | Transporter | Peptidase | Colleto. long contig <sup>3</sup> | No. Colleto. <sup>4</sup> |
|-----|--------|----------------------------------------------|----------------------------------------|--------|------------------------|--------------------|----------|-------------|-----------|-----------------------------------|---------------------------|
| 1   | 1      | <i>O. dolichostomum.scf101_28.g24</i>        | hypothetical_protein_UCRPA7_6765       | 88     | Clade_ABC              | unknown            |          |             |           | 1                                 | >1                        |
| 2   | 2      | <i>O. dolichostomum.scf11_77.g11</i>         | cellulose_beta-cellobiosidase          | 100    | Clade_ABC              | Colleto            | GH7      |             |           | 1                                 | >1                        |
| 3   | 3      | <i>O. dolichostomum.scf126_25.g16</i>        | mas3_protein                           | 85     | Clade_ABC              | Magnapo            |          |             |           | 1                                 | >1                        |
| 4   | 4      | <i>O. dolichostomum.scf144_30.g6</i>         | heterokaryon_incompatibility_protein   | 96     | Clade_A                | unknown            |          |             |           | 1                                 | >1                        |
| 5   | 5      | <i>O. dolichostomum.scf151_30.g15</i>        | endoplasmic_reticulum_protein          | 99     | Clade_ABC              | Magnapo            |          |             |           | 1                                 | >1                        |
| 6   | 6      | <i>O. dolichostomum.scf154_22.g13</i>        | extracellular_dihydrogeodin_oxidase    | 100    | Clade_ABC              | unknown            | AA1      | TC-DB       |           | 1                                 | >1                        |
| 7   | 7      | <i>O. dolichostomum.scf166_20.g2</i>         | dj-1_family_protein                    | 99     | Clade_ABC              | unknown            |          |             | C56       | 1                                 | >1                        |
| 8   | 8      | <i>O. dolichostomum.scf188_26.g8</i>         | peroxysomal_citrate_synthase           | 100    | Clade_A                | Colleto            |          |             |           | 1                                 | >1                        |
| 9   | 9      | <i>O. dolichostomum.scf190_26.g6</i>         | hypothetical_protein                   | 100    | Clade_ABC              | Colleto            |          |             |           | 1                                 | >1                        |
| 10  | 10     | <i>O. dolichostomum.scf20_68.g26</i>         | nacht_and_tpr_domain-containing        | 98     | Clade_ABC              | Colleto            |          |             |           | 1                                 | >1                        |
| 11  | 11     | <b><i>O. dolichostomum.scf201_21.g1</i></b>  | hypothetical_protein                   | 100    | Clade_ABC              | unknown            |          |             |           | 1                                 | >1                        |
| 12  | 12     | <b><i>O. dolichostomum.scf201_21.g3</i></b>  | delta_sterol_reductase                 | 99     | Clade_ABC              | Magnapo            |          |             |           | 1                                 | >1                        |
| 13  | 13     | <b><i>O. dolichostomum.scf202_21.g15</i></b> | hypothetical_protein                   | 100    | Clade_ABC              | unknown            |          |             |           | 1                                 | 1                         |
| 14  | 14     | <b><i>O. dolichostomum.scf202_21.g16</i></b> | monocarboxylate_permease-like          | 100    | Clade_ABC              | Colleto            |          | TC-DB       |           | 1                                 | >1                        |
| 15  | 15     | <i>O. dolichostomum.scf209_20.g7</i>         | hypothetical_protein                   | 100    | Clade_A                | unknown            |          |             |           | 1                                 | >1                        |
| 16  | 16     | <i>O. dolichostomum.scf239_23.g16</i>        | hypothetical_protein                   | 100    | Clade_A                | unknown            |          |             | M38       | 1                                 | 1                         |
| 17  | 17     | <b><i>O. dolichostomum.scf278_18.g13</i></b> | transcription_factor_domain-containing | 100    | Clade_A                | unknown            |          |             |           | 1                                 | >1                        |
| 18  | 18     | <b><i>O. dolichostomum.scf278_18.g15</i></b> | mannitol_1-phosphate_dehydrogenase     | 100    | Clade_ABC              | Magnapo            |          |             |           | 1                                 | >1                        |
| 19  | 19     | <i>O. dolichostomum.scf290_20.g12</i>        | amino-acid_permease_inda1              | 100    | Clade_A                | unknown            |          | TC-DB       |           | 1                                 | >1                        |
| 20  | 20     | <i>O. dolichostomum.scf300_18.g3</i>         | hypothetical_protein                   | 87     | Clade_A                | Magnapo            |          |             |           | 1                                 | >1                        |
| 21  | 21     | <i>O. dolichostomum.scf304_7.g6</i>          | acyltransferase-like_protein           | 99     | Clade_C                | Magnapo            |          |             |           | 1                                 | 1                         |
| 22  | 22     | <i>O. dolichostomum.scf33_56.g43</i>         | hypothetical_protein                   | 98     | Clade_ABC              | unknown            |          |             |           | 1                                 | 1                         |
| 23  | 23     | <i>O. dolichostomum.scf357_13.g5</i>         | hypothetical_protein                   | 100    | Clade_ABC              | Magnapo            |          |             |           | 1                                 | >1                        |
| 24  | 24     | <i>O. dolichostomum.scf381_9.g9</i>          | abc_transporter                        | 100    | Clade_ABC              | unknown            |          | TC-DB       |           | 1                                 | >1                        |
| 25  | 25     | <i>O. dolichostomum.scf395_11.g11</i>        | pheromone-regulated_membrane_pro.      | 96     | Clade_ABC              | Colleto            |          |             |           | 1                                 | >1                        |
| 26  | 26     | <b><i>O. dolichostomum.scf4_87.g18</i></b>   | hypothetical_protein                   | 100    | Clade_A                | Colleto            |          |             |           | 1                                 | >1                        |
| 27  | 27     | <b><i>O. dolichostomum.scf4_87.g20</i></b>   | hypothetical_protein                   | 100    | Clade_A                | Colleto            |          |             |           | 1                                 | >1                        |
| 28  | 28     | <i>O. dolichostomum.scf405_11.g4</i>         | methyltransferase_domain-containing    | 100    | Clade_ABC              | unknown            |          |             |           | 1                                 | >1                        |
| 29  | 29     | <i>O. dolichostomum.scf43_45.g19</i>         | nadh-dependent_fm_n_reductase          | 98     | Clade_ABC              | unknown            |          |             |           | 1                                 | >1                        |
| 30  | 30     | <i>O. dolichostomum.scf458_9.g5</i>          | hypothetical_protein                   | 100    | Clade_ABC              | unknown            |          | TC-DB       |           | 1                                 | >1                        |
| 31  | 31     | <i>O. dolichostomum.scf460_13.g3</i>         | peptidase_family_m28                   | 100    | Clade_ABC              | Magnapo            | CBM12    |             | M28A      | 1                                 | >1                        |
| 32  | 32     | <i>O. dolichostomum.scf464_12.g9</i>         | fungal_cellulose_binding_domain        | 100    | Clade_A                | Colleto            | GH5 CBM1 |             |           | 1                                 | >1                        |
| 33  | 33     | <i>O. dolichostomum.scf49_41.g18</i>         | cation_diffusion_facilitator_1_protein | 99     | Clade_ABC              | unknown            |          |             |           | 1                                 | >1                        |
| 34  | 34     | <i>O. dolichostomum.scf493_7.g4</i>          | serine_carboxypeptidase_s28            | 100    | Clade_ABC              | unknown            |          |             | S28       | 1                                 | >1                        |
| 35  | 35     | <i>O. dolichostomum.scf493_7.g7</i>          | choline_dehydrogenase                  | 100    | Clade_ABC              | Colleto            | AA3      |             |           | 1                                 | >1                        |
| 36  | 36     | <i>O. dolichostomum.scf50_54.g15</i>         | glycosyl_hydrolase_family_43           | 100    | Clade_A                | unknown            | GH43     |             |           | 1                                 | >1                        |
| 37  | 37     | <i>O. dolichostomum.scf504_7.g1</i>          | chitinase_1                            | 100    | Clade_ABC              | Colleto            | GH18     |             |           | 1                                 | >1                        |
| 38  | 38     | <i>O. dolichostomum.scf517_12.g6</i>         | fad_dependent_oxidoreductase           | 100    | Clade_A                | unknown            |          |             |           | 1                                 | >1                        |
| 39  | 39     | <i>O. dolichostomum.scf52_54.g42</i>         | glycoside_hydrolase_family_27_protein  | 99     | Clade_A                | Colleto            | GH27     |             |           | 1                                 | >1                        |

|    |    |                                      |                                       |     |           |         |         |       |   |    |
|----|----|--------------------------------------|---------------------------------------|-----|-----------|---------|---------|-------|---|----|
| 40 | 40 | <i>O. dolichostomum.scf522_8.g3</i>  | sugar_transporter                     | 100 | Clade_BC  | Magnapo |         |       | 1 | >1 |
| 41 | 41 | <i>O. dolichostomum.scf525_9.g5</i>  | hypothetical_protein                  | 100 | Clade_A   | Colleto |         |       | 1 | >1 |
| 42 | 42 | <i>O. dolichostomum.scf53_51.g8</i>  | ncs1_allantoate_transporter_protein   | 100 | Clade_A   | unknown |         | TC-DB | 1 | >1 |
| 43 | 43 | <i>O. dolichostomum.scf544_8.g7</i>  | serine_carboxypeptidase               | 100 | Clade_A   | Magnapo |         | S6    | 1 | >1 |
| 44 | 44 | <i>O. dolichostomum.scf577_7.g2</i>  | sir2_family_protein                   | 100 | Clade_ABC | unknown |         |       | 1 | >1 |
| 45 | 45 | <i>O. dolichostomum.scf578_3.g1</i>  | cellulose_binding_domain-containing   | 100 | Clade_BC  | Magnapo | AA3 AA8 |       | 1 | 1  |
| 46 | 46 | <i>O. dolichostomum.scf613_6.g3</i>  | amino_acid_permease                   | 98  | Clade_C   | Magnapo |         | TC-DB | 1 | >1 |
| 47 | 47 | <i>O. dolichostomum.scf658_4.g4</i>  | duf563_domain-containing_protein      | 86  | Clade_ABC | Magnapo | GT61    |       | 1 | 1  |
| 48 | 48 | <i>O. dolichostomum.scf71_46.g2</i>  | alcohol_dehydrogenase                 | 100 | Clade_ABC | unknown |         |       | 1 | >1 |
| 49 | 49 | <i>O. dolichostomum.scf81_43.g10</i> | vesicles_protein_erv14_protein        | 96  | Clade_ABC | unknown |         |       | 1 | >1 |
| 50 | 50 | <i>O. dolichostomum.scf89_37.g18</i> | thioester_reductase_domain-containing | 97  | Clade_A   | Magnapo |         |       | 1 | >1 |
| 51 | 51 | <i>O. dolichostomum.scf95_39.g35</i> | tri7-like_toxin_biosynthesis_protein  | 100 | Clade_A   | unknown |         |       | 0 | 1  |

\* Physically-linked genes are shown in bold face.

<sup>1</sup> Magnaporthales comprise three major clades (i.e., clades A, B and C). This column indicates which clades were involved in the gene transfer with *Colletotrichum*.

<sup>2</sup> The putative donor of the gene transfers between Magnaporthales and *Colletotrichum*.

<sup>3</sup> If one or more transferred *Colletotrichum* genes are located in long contigs (encoding  $\geq 5$  genes), value (1) is assigned. Value (0) is assigned otherwise.

<sup>4</sup> Number of *Colletotrichum* species involved in the individual HGT instance.
