# Supplementary material for: Extensive horizontal gene transfers between plant pathogenic fungi
Source: PubMed Central journal article supplement (PMC4876562; doi:10.1186/s12915-016-0264-3), 2016-05-23
Supplement: 12915_2016_264_MOESM10_ESM.pdf [file 12915_2016_264_MOESM10_ESM.pdf]

Additional file 10. Sordariomycetes genome assemblies used for the HGT validation procedure.

| No. | Order         | Species                            | GenBank assembly accession |
|-----|---------------|------------------------------------|----------------------------|
| 1   | Glomerellales | <i>Verticillium alfalfae</i>       | GCA_000150825.1            |
| 2   | Glomerellales | <i>Verticillium dahliae</i>        | GCA_000952015.1            |
| 3   | Glomerellales | <i>Verticillium longisporum</i>    | GCA_001268165.1            |
| 4   | Glomerellales | <i>Verticillium tricorpus</i>      | GCA_000732205.1            |
| 5   | Hypocreales   | <i>Aciculosporium take</i>         | GCA_000222935.2            |
| 6   | Hypocreales   | <i>Acremonium chrysogenum</i>      | GCA_000769265.1            |
| 7   | Hypocreales   | <i>Atkinsonella hypoxylon</i>      | GCA_000729835.1            |
| 8   | Hypocreales   | <i>Atkinsonella texensis</i>       | GCA_001008105.1            |
| 9   | Hypocreales   | <i>Balansia obtecta</i>            | GCA_000709145.1            |
| 10  | Hypocreales   | <i>Beauveria bassiana</i>          | GCA_000770705.1            |
| 11  | Hypocreales   | <i>Beauveria rudraprayagi</i>      | GCA_000733645.1            |
| 12  | Hypocreales   | <i>Claviceps fusiformis</i>        | GCA_000223055.1            |
| 13  | Hypocreales   | <i>Claviceps paspali</i>           | GCA_000223175.2            |
| 14  | Hypocreales   | <i>Claviceps purpurea</i>          | GCA_000347355.1            |
| 15  | Hypocreales   | <i>Clonostachys rosea</i>          | GCA_000963775.2            |
| 16  | Hypocreales   | <i>Cordyceps militaris</i>         | GCA_000225605.1            |
| 17  | Hypocreales   | <i>Dactylonectria macrodidyma</i>  | GCA_000935225.1            |
| 18  | Hypocreales   | <i>Epichloe amarillans</i>         | GCA_000877375.1            |
| 19  | Hypocreales   | <i>Epichloe aotearoae</i>          | GCA_000729855.1            |
| 20  | Hypocreales   | <i>Epichloe baconii</i>            | GCA_000729845.1            |
| 21  | Hypocreales   | <i>Epichloe brachyelytri</i>       | GCA_000222915.1            |
| 22  | Hypocreales   | <i>Epichloe bromicola</i>          | GCA_001008065.1            |
| 23  | Hypocreales   | <i>Epichloe elymi</i>              | GCA_000315335.1            |
| 24  | Hypocreales   | <i>Epichloe festucae</i>           | GCA_000226195.1            |
| 25  | Hypocreales   | <i>Epichloe gansuensis</i>         | GCA_000222895.2            |
| 26  | Hypocreales   | <i>Epichloe gansuensis</i>         | GCA_000309355.1            |
| 27  | Hypocreales   | <i>Epichloe glyceriae</i>          | GCA_000225285.2            |
| 28  | Hypocreales   | <i>Epichloe sp_AL9924</i>          | GCA_000729825.1            |
| 29  | Hypocreales   | <i>Epichloe sylvatica</i>          | GCA_001008265.1            |
| 30  | Hypocreales   | <i>Epichloe typhina</i>            | GCA_000222955.2            |
| 31  | Hypocreales   | <i>Epichloe uncinata</i>           | GCA_001043855.1            |
| 32  | Hypocreales   | <i>Escovopsis weberi</i>           | GCA_001278495.1            |
| 33  | Hypocreales   | <i>Fusarium avenaceum</i>          | GCA_000769215.1            |
| 34  | Hypocreales   | <i>Fusarium circinatum</i>         | GCA_000876485.1            |
| 35  | Hypocreales   | <i>Fusarium fujikuroi</i>          | GCA_001023045.1            |
| 36  | Hypocreales   | <i>Fusarium graminearum</i>        | GCA_000966635.1            |
| 37  | Hypocreales   | <i>Fusarium langsethiae</i>        | GCA_001292635.1            |
| 38  | Hypocreales   | <i>Fusarium nygamai</i>            | GCA_001262555.1            |
| 39  | Hypocreales   | <i>Fusarium oxysporum</i>          | GCA_000733055.2            |
| 40  | Hypocreales   | <i>Fusarium pseudograminearum</i>  | GCA_000974265.1            |
| 41  | Hypocreales   | <i>Fusarium sp_JS626</i>           | GCA_000966865.1            |
| 42  | Hypocreales   | <i>Fusarium temperatum</i>         | GCA_001513835.1            |
| 43  | Hypocreales   | <i>Fusarium verticillioides</i>    | GCA_000149555.1            |
| 44  | Hypocreales   | <i>Fusarium virguliforme</i>       | GCA_000585705.1            |
| 45  | Hypocreales   | <i>Hirsutella minnesotensis</i>    | GCA_000956045.1            |
| 46  | Hypocreales   | <i>Hirsutella thompsonii</i>       | GCA_000472125.2            |
| 47  | Hypocreales   | <i>Hypocrella siamensis</i>        | GCA_000731825.1            |
| 48  | Hypocreales   | <i>Isaria farinosa</i>             | GCA_000733625.1            |
| 49  | Hypocreales   | <i>Metarhizium acridum</i>         | GCA_000187405.1            |
| 50  | Hypocreales   | <i>Metarhizium album</i>           | GCA_000804445.1            |
| 51  | Hypocreales   | <i>Metarhizium anisopliae</i>      | GCA_000814975.1            |
| 52  | Hypocreales   | <i>Metarhizium brunneum</i>        | GCA_000814965.1            |
| 53  | Hypocreales   | <i>Metarhizium guizhouense</i>     | GCA_000814955.1            |
| 54  | Hypocreales   | <i>Metarhizium majus</i>           | GCA_000814945.1            |
| 55  | Hypocreales   | <i>Metarhizium robertsii</i>       | GCA_000187425.2            |
| 56  | Hypocreales   | <i>Nectria haematococca</i>        | GCA_000151355.1            |
| 57  | Hypocreales   | <i>Neonectria ditissima</i>        | GCA_001306435.1            |
| 58  | Hypocreales   | <i>Ophiocordyceps sinensis</i>     | GCA_000448365.1            |
| 59  | Hypocreales   | <i>Ophiocordyceps unilateralis</i> | GCA_001272575.1            |

|     |                 |                                      |                 |
|-----|-----------------|--------------------------------------|-----------------|
| 60  | Hypocreales     | <i>Paecilomyces hepiali</i>          | GCA_001455915.1 |
| 61  | Hypocreales     | <i>Periglandula ipomoeae</i>         | GCA_000222875.2 |
| 62  | Hypocreales     | <i>Pochonia chlamydosporia</i>       | GCA_000411695.1 |
| 63  | Hypocreales     | <i>Purpureocillium lilacinum</i>     | GCA_001468795.1 |
| 64  | Hypocreales     | <i>Stachybotrys chartarum</i>        | GCA_001021365.1 |
| 65  | Hypocreales     | <i>Stachybotrys chlorohalonata</i>   | GCA_000732775.1 |
| 66  | Hypocreales     | <i>Tolypocladium inflatum</i>        | GCA_000421905.1 |
| 67  | Hypocreales     | <i>Tolypocladium ophioglossoides</i> | GCA_001189435.1 |
| 68  | Hypocreales     | <i>Tolypocladium sp_Salcha_MEA-2</i> | GCA_000750145.2 |
| 69  | Hypocreales     | <i>Tolypocladium sp_Sup5_PDA-1</i>   | GCA_000750105.3 |
| 70  | Hypocreales     | <i>Torrubiella hemipterigena</i>     | GCA_000825705.1 |
| 71  | Hypocreales     | <i>Trichoderma atroviride</i>        | GCA_000963795.1 |
| 72  | Hypocreales     | <i>Trichoderma gamsii</i>            | GCA_001481775.1 |
| 73  | Hypocreales     | <i>Trichoderma hamatum</i>           | GCA_000331835.2 |
| 74  | Hypocreales     | <i>Trichoderma harzianum</i>         | GCA_000733085.2 |
| 75  | Hypocreales     | <i>Trichoderma longibrachiatum</i>   | GCA_000332775.1 |
| 76  | Hypocreales     | <i>Trichoderma parareesei</i>        | GCA_001050175.1 |
| 77  | Hypocreales     | <i>Trichoderma reesei</i>            | GCA_000513815.1 |
| 78  | Hypocreales     | <i>Trichoderma virens</i>            | GCA_000170995.2 |
| 79  | Hypocreales     | <i>Ustilaginoidea virens</i>         | GCA_000965225.1 |
| 80  | Microascales    | <i>Ceratocystis albifundus</i>       | GCA_000813685.1 |
| 81  | Microascales    | <i>Ceratocystis fimbriata</i>        | GCA_000389695.2 |
| 82  | Microascales    | <i>Ceratocystis manginecans</i>      | GCA_000712455.1 |
| 83  | Microascales    | <i>Ceratocystis platani</i>          | GCA_000978885.1 |
| 84  | Microascales    | <i>Huntiaella moniliformis</i>       | GCA_000712465.1 |
| 85  | Microascales    | <i>Huntiaella omanensis</i>          | GCA_000833645.1 |
| 86  | Microascales    | <i>Huntiaella savannae</i>           | GCA_001483325.1 |
| 87  | Microascales    | <i>Scedosporium apiospermum</i>      | GCA_000732125.1 |
| 88  | Microascales    | <i>Scedosporium aurantiacum</i>      | GCA_000812075.1 |
| 89  | Microascales    | <i>Thielaviopsis musarum</i>         | GCA_001513885.1 |
| 90  | Microascales    | <i>Thielaviopsis punctulata</i>      | GCA_000968615.1 |
| 91  | Diaporthales    | <i>Chrysosporthe austroafricana</i>  | GCA_001051155.1 |
| 92  | Diaporthales    | <i>Chrysosporthe cubensis</i>        | GCA_001282315.1 |
| 93  | Diaporthales    | <i>Diaporthe ampelina</i>            | GCA_001006365.1 |
| 94  | Diaporthales    | <i>Diaporthe aspalathi</i>           | GCA_001447215.1 |
| 95  | Diaporthales    | <i>Diaporthe longicolla</i>          | GCA_000498855.2 |
| 96  | Diaporthales    | <i>Ophiognomonium clavignenti</i>    | GCA_000220195.1 |
| 97  | Diaporthales    | <i>Valsa mali</i>                    | GCA_000818155.1 |
| 98  | Ophiostomatales | <i>Grosmania clavigera</i>           | GCA_000143125.1 |
| 99  | Ophiostomatales | <i>Leptographium lundbergii</i>      | GCA_001455505.1 |
| 100 | Ophiostomatales | <i>Leptographium procerum</i>        | GCA_000806385.1 |
| 101 | Ophiostomatales | <i>Ophiostoma novo-ulmi</i>          | GCA_000317715.1 |
| 102 | Ophiostomatales | <i>Ophiostoma piceae</i>             | GCA_000410735.1 |
| 103 | Ophiostomatales | <i>Sporothrix brasiliensis</i>       | GCA_000820605.1 |
| 104 | Ophiostomatales | <i>Sporothrix pallida</i>            | GCA_000710705.1 |
| 105 | Ophiostomatales | <i>Sporothrix schenckii</i>          | GCA_000961545.1 |
| 106 | Sordariales     | <i>Chaetomium globosum</i>           | GCA_000143365.1 |
| 107 | Sordariales     | <i>Chaetomium thermophilum</i>       | GCA_000221225.1 |
| 108 | Sordariales     | <i>Madurella mycetomatis</i>         | GCA_001275765.1 |
| 109 | Sordariales     | <i>Myceliophthora thermophila</i>    | GCA_000226095.1 |
| 110 | Sordariales     | <i>Neurospora africana</i>           | GCA_000604205.2 |
| 111 | Sordariales     | <i>Neurospora crassa</i>             | GCA_000786625.1 |
| 112 | Sordariales     | <i>Neurospora pannonica</i>          | GCA_000604225.2 |
| 113 | Sordariales     | <i>Neurospora sublineolata</i>       | GCA_000604185.2 |
| 114 | Sordariales     | <i>Neurospora terricola</i>          | GCA_000604245.2 |
| 115 | Sordariales     | <i>Neurospora tetrasperma</i>        | GCA_000213195.1 |
| 116 | Sordariales     | <i>Sordaria macrospora</i>           | GCA_000182805.2 |
| 117 | Togniniales     | <i>Phaeoacremonium minimum</i>       | GCA_000392275.1 |
| 118 | Xylariales      | <i>Daldinia eschscholtzii</i>        | GCA_000261445.1 |
| 119 | Xylariales      | <i>Eutypa lata</i>                   | GCA_000349385.1 |
| 120 | Xylariales      | <i>Hypoxylon sp_E7406B</i>           | GCA_000931505.1 |
| 121 | Xylariales      | <i>Pestalotiopsis fici</i>           | GCA_000516985.1 |
| 122 | Xylariales      | <i>Rosellinia necatrix</i>           | GCA_001445595.1 |
| 123 | Xylariales      | <i>Xylaria sp_JS573</i>              | GCA_000966885.1 |
