# Supplementary material for: Extensive horizontal gene transfers between plant pathogenic fungi
Source: PubMed Central journal article supplement (PMC4876562; doi:10.1186/s12915-016-0264-3), 2016-05-23
Supplement: 12915_2016_264_MOESM12_ESM.pdf [file 12915_2016_264_MOESM12_ESM.pdf]

Additional file 12. Vertebrate and fungal genome data underlying Fig. 1A.

| No. | Species                                   | NCBI Genome ID Number |
|-----|-------------------------------------------|-----------------------|
| 1   | human <i>Homo sapiens</i>                 | 51                    |
| 2   | opossum <i>Monodelphis domestica</i>      | 220                   |
| 3   | chicken <i>Gallus gallus</i>              | 111                   |
| 4   | frog <i>Xenopus tropicalis</i>            | 80                    |
| 5   | Spotted gar <i>Lepisosteus oculatus</i>   | 10597                 |
| 6   | elephant shark <i>Callorhynchus milii</i> | 689                   |
| 7   | sea lamprey <i>Petromyzon marinus</i>     | 287                   |
| 8   | tunicate <i>Ciona intestinalis</i>        | 49                    |
| 9   | <i>Magnaporthiopsis incrustans</i>        | * Ref. 16             |
| 10  | <i>Nakataea oryzae</i>                    | * Ref. 16             |
| 11  | <i>Pyricularia oryzae</i>                 | 62                    |
| 12  | <i>Ophioceras dolichostomum</i>           | * Ref. 16             |
| 13  | <i>Pseudohelonectia lignicola</i>         | * Ref. 16             |
| 14  | <i>Grosmannia clavigera</i>               | 2302                  |
| 15  | <i>Neurospora crassa</i>                  | 19                    |
| 16  | <i>Thielavia terrestris</i>               | 10696                 |

\* No available NCBI Genome ID Number.
